# Supplementary material for: Higher HOPX expression is associated with distinct clinical and biological features and predicts poor prognosis in de novo acute myeloid leukemia
Source: PubMed Central journal article supplement — Haematologica. 2017 Jun;102(6):1044–53. doi: 10.3324/haematol.2016.161257 (PMC5451336; doi:10.3324/haematol.2016.161257), 2017-06
Supplement: 2016_161257-Disclosures_and_Contributions.pdf [file 2016_161257-Disclosures_and_Contributions.pdf]

Haematologica  
HAEMATOL/2016/161257  
Version 3

Higher *HOPX* expression is associated with distinct clinical and biological features and predicts poor prognosis in *de novo* acute myeloid leukemia

Chien-Chin Lin, Yueh-Chwen Hsu, Yi-Hung Li, Yuan-Yeh Kuo, Hsin-An Hou, Keng-Hsueh Lan, Tsung-Chih Chen, Yi-Shiuan Tzeng, Yi-Yi Kuo, Chein-Jun Kao, Po-Han Chuang, Mei-Hsuan Tseng, Yu-Chiao Chiu, Wen-Chien Chou, and Hwei-Fang Tien

Disclosures: none

Contributions: C.C. Lin wrote the paper, performed the research and analyzed data. Y.C. Chiu wrote the paper and analyzed data. W.C. Chou and H.F. Tien planned, designed, coordinated the research and wrote the manuscript. Y.C. Hsu, Y.Y. Kuo, Y.H. Li, H.A. Hou, K.H. Lan, T.C. Chen, Y.S. Tzeng, Y.Y. Kuo, C.J. Kao, P.H. Chuang, and M.H. Tseng provided important materials and help in the study.
